# Supplementary material for: Premedication with a cathepsin C inhibitor alleviates early primary graft dysfunction in mouse recipients after lung transplantation
Source: PubMed Central journal article supplement (PMC6616352; doi:10.1038/s41598-019-46206-8), 2019-07-09
Supplement: 41598_2019_46206_MOESM1_ESM.pdf [file 41598_2019_46206_MOESM1_ESM.pdf]

## Supplementary information

Premedication with a cathepsin C inhibitor alleviates early primary graft dysfunction in mouse recipients after lung transplantation

Salome R.T. Rehm,<sup>1</sup> Natalia F. Smirnova,<sup>1</sup> Carmela Morrone,<sup>1</sup> Jessica Götzfried,<sup>1</sup> Annette Feuchtinger,<sup>2</sup> John Pedersen,<sup>3</sup> Brice Korkmaz,<sup>4</sup> Ali Önder Yildirim,<sup>1,5</sup> and Dieter E. Jenne<sup>1,5,6</sup>

Figure 1

A

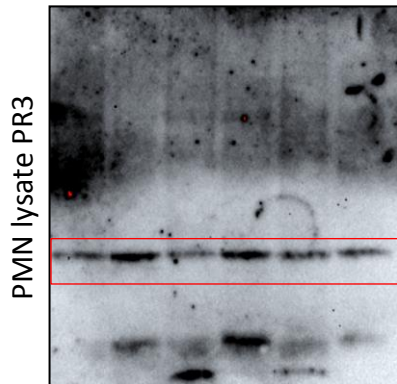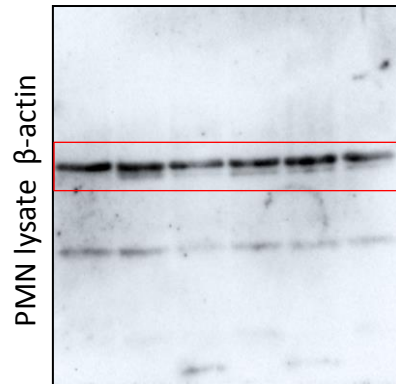

B

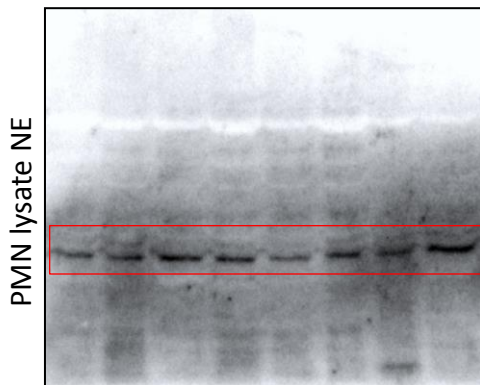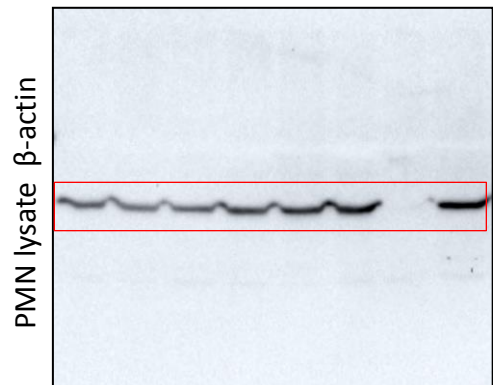

Figure 1: **Full blots shown in Figure 1D:** Blotted PMN lysates of ICatC and Veh treated mice. ICatC and Veh lysates were alternated loaded, starting with Veh. Left: (A) PR3, (B) NE. Right: Belonging  $\beta$ -actin signal

Figure 2

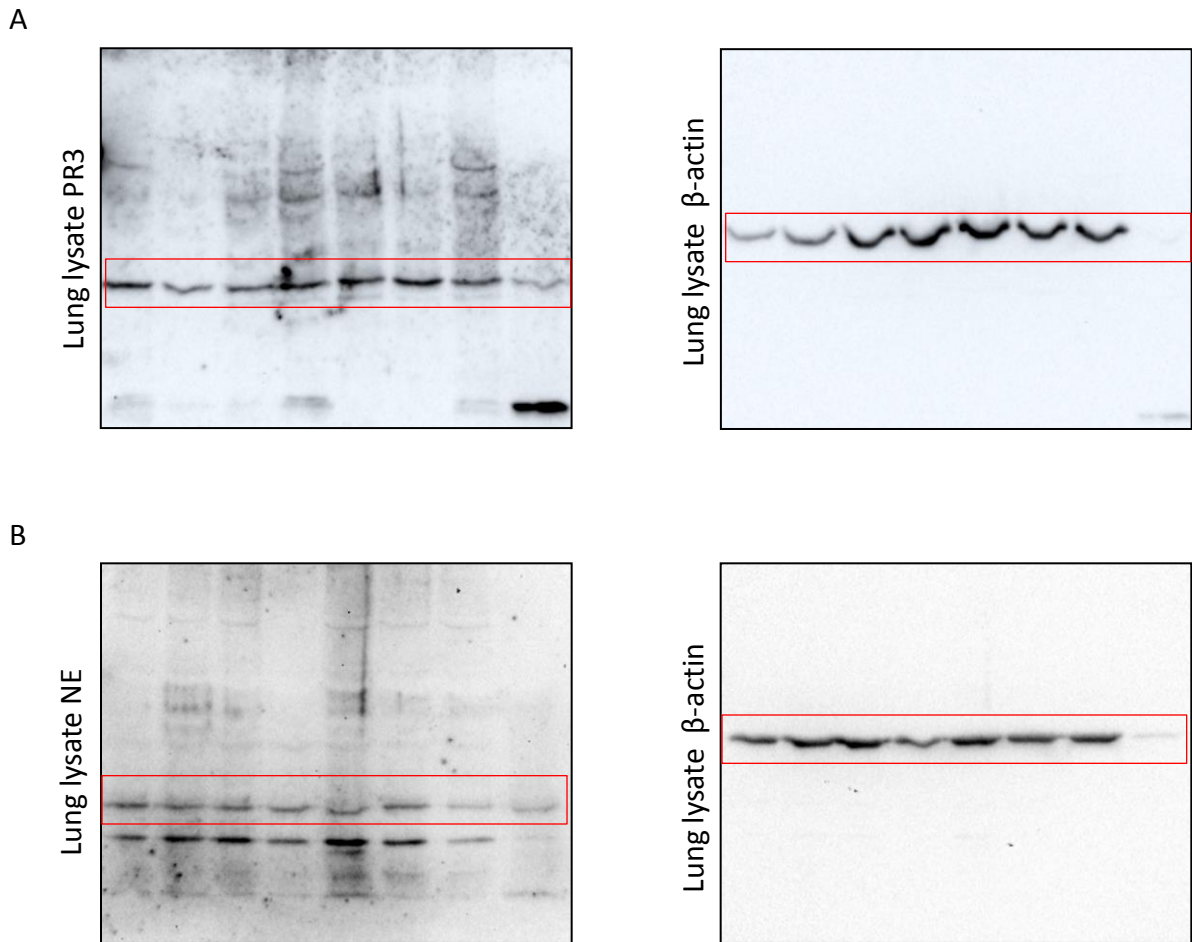

Figure 2: **Full blots shown in Figure 3B:** Blotted whole lung lysates of ICatC and Veh treated mice. . ICatC and Veh lysates were alternated loaded, starting with ICatC Left: (A) PR3, (B) NE. Right: Belonging  $\beta$ -actin signal
